# Routine Psychological Screening in Youth With Type 1 Diabetes and Their Parents

A notion whose time has come?

FERGUS J. CAMERON, MD<sup>1</sup>  
ELISABETH A. NORTHAM, PHD<sup>2</sup>

GEOFFERY R. AMBLER, MD<sup>3</sup>  
DENIS DANEMAN, MD<sup>4</sup>

young, in light of emerging mental health imperatives.

In the post-DCCT (Diabetes Control and Complications Trial) (1) and -EDIC (Epidemiology of Diabetes Interventions and Complications) (2) eras, considerable effort has been expended on early detection and treatment of diabetes-related microvascular complications in youth using screening programs. Numerous consensus statements have been generated relating to the timing, frequency, and content of such programs (3–7). Although each recommends a slightly different approach to screening, the same basic principles apply—achieve and maintain excellent glycemic control; reduce known and modifiable risk factors, such as smoking, obesity, hyperlipidemia, and hypertension; and screen for nephropathy and retinopathy on a regular basis following the onset of puberty.

To be considered successful, any screening program must satisfy several criteria (8):

- Is the prevalence of the condition being screened for high enough to warrant universal screening?
- Do the tests used by the screening program have sufficient specificity and sensitivity to allow for appropriate detection of true positive cases?
- Is there an adequate intervention strategy for those patients detected by the screening process?
- Is the screening process cost-effective?

From the <sup>1</sup>Department of Endocrinology and Diabetes, Royal Children's Hospital, and Murdoch Children's Research Institute, Melbourne, Victoria, Australia; the <sup>2</sup>Department of Psychology, Royal Children's Hospital and the University of Melbourne, Melbourne, Victoria, Australia; the <sup>3</sup>Department of Endocrinology and Diabetes, The Children's Hospital at Westmead, Sydney, Australia; and the <sup>4</sup>Division of Endocrinology, Department of Pediatrics, University of Toronto, Hospital for Sick Children, Toronto, Ontario, Canada.

Address correspondence and reprint requests to Fergus J. Cameron, Head of Diabetes Services, Royal Children's Hospital, Parkville, Melbourne, Victoria 3052, Australia. E-mail: fergus.cameron@rch.org.au.

Received for publication 27 March 2007 and accepted in revised form 13 July 2007.

Published ahead of print at <http://care.diabetesjournals.org> on 20 July 2007. DOI: 10.2337/dc07-0603.

**Abbreviations:** BGM, blood glucose monitoring; CHQ, Child Health Questionnaire; DCCT, Diabetes Control and Complications Trial; DQOL, Diabetes Quality of Life; EDIC, Epidemiology of Diabetes Interventions and Complications; HRQOL, health-related quality of life; PedsQL, Pediatric Quality of Life Inventory.

A table elsewhere in this issue shows conventional and Système International (SI) units and conversion factors for many substances.

© 2007 by the American Diabetes Association.

Certainly, given what we know about microvascular complications and their progression and treatment, universal diabetes complication screening programs satisfy most of these prerequisites. Ten years after the DCCT, average levels of metabolic control have improved in most clinical reports of children and adolescents with type 1 diabetes, although population-based data remain scanty and perhaps less optimistic (9–14). Contemporary clinic-based reports of microvascular complication rates in adolescence have shown a concomitant improvement (15–18).

On the other hand, reports relating to health-related quality of life (HRQOL) and psychological outcomes have been distressingly suboptimal (19–24). Although not all studies report significant associations (25–27), there are a number of reports showing that psychosocial dysfunction and family conflict are close correlates of poor health outcomes (28–33). Furthermore, the Hvidoere International Study Group demonstrated a close correlation between HRQOL and A1C in a large adolescent cohort (34). Thus, identifying and targeting psychosocial dysfunction should be an important focus for screening if diabetes-related morbidity and, perhaps in the longer term, mortality is to be reduced. The purpose of this review is to reassess traditional diabetes complication screening programs in the

## Is the prevalence of psychosocial distress in youth with type 1 diabetes sufficiently high enough to warrant universal screening?

**Functional health (HRQOL).** The medical literature pertaining to functional health in children and adolescents with diabetes can be divided into those who use generic or nondiabetes-specific measures and those who use diabetes-specific measures. The former studies allow HRQOL to be compared between diabetic and nondiabetic youth, whereas the latter studies allow HRQOL comparison solely within diabetic cohorts. In addition to this defining aspect of the two approaches to measuring HRQOL, disease-specific measures of HRQOL may underestimate the overall negative impact of diabetes by failing to take into account broader indirect lifestyle factors (35,36).

To date, two generic HRQOL tools have been used to compare diabetic and nondiabetic cohorts. The Pediatric Quality of Life Inventory (PedsQL) has been validated in diabetic cohorts (37) and used to compare diabetic and nondiabetic youth (38). This group found that HRQOL as measured by PedsQL was similar between youth with type 1 diabetes and a healthy control sample. Within the diabetic cohort, they reported that diabetes-specific family conflict was the only significant predictor of negative HRQOL. Another generic tool, the Child Health Questionnaire (CHQ) (39), has been used in both cross-sectional and longitudinal studies to compare diabetic youth with healthy children and children with other chronic diseases. One tertiary hospital clinic reported significantly impaired HRQOL (including physical and psychosocial impact on family) in cross-sectional and longitudinal studies of youth with type 1 diabetes (40,41). These findings have been replicated by other groups using the CHQ to compare diabetic youth with healthy control subjects and children with other chronic diseases (42–45). Poor overall HRQOL in children and

adolescents with diabetes does not appear to improve with time (41,43) and closely mirrors the longitudinal data concerning clinical and behavioral outcomes in childhood and adolescence (23,46,47). Indeed, CHQ global behavior and mental health scale scores accurately predict Behavior Assessment System for Children scale scores for externalizing and internalizing problems, respectively, in diabetic youth (48). The deleterious impact of type 1 diabetes on HRQOL as measured by CHQ is significant—it being comparable to HRQOL seen in children and adolescents suffering from life-threatening diseases such as cystic fibrosis or leukemia (45,49). This notion is further supported by longitudinal research up to 15 years after diagnosis of children with leukemia and diabetes showing that, while initial psychological distress scores are greater for parents of children with leukemia, distress over time is greater and more pervasive for families with children with diabetes (50).

Differences in findings between the CHQ and PedsQL may reflect qualitative differences in the various subscales or variable sensitivity to “response shift” across the different measures. Response shift is the tendency for people with chronic disease to regard their lives positively, despite the hardships imposed on them by the chronic disease (51,52). One possible way to deal with this phenomenon may be to use disease-specific HRQOL measures in tandem with generic measures (42,53).

The most widely used diabetes-specific HRQOL measure has been the Diabetes Quality of Life (DQOL). The DQOL has been used in the DCCT (54,55) and the Hvidoere multicenter comparative studies (34,56,57) to assess the impact of diabetes-specific interventions or varying treatment regimens/outcomes. In addition, the DQOL has been used to investigate the influence of underlying personal and family factors (27) and the impact of insulin pump therapy (58,59) on HRQOL. In the large multicenter international study of 2,101 adolescents using the DQOL, the Hvidoere Study Group found that lower A1C was associated with lower diabetes impact, fewer worries, greater satisfaction, and better health perception (56). Other groups addressing this question have sampled much smaller cohorts (52–130 subjects) and have used the DQOL, PedsQL, and CHQ. Two studies (60,61) replicated the Hvidoere Study Group’s

findings, while three reports (27,40,42) failed to show an association between metabolic control status and quality of life.

It is clear that type 1 diabetes in childhood and adolescence is associated with significantly reduced HRQOL as measured by physical, psychological, and family well-being. In addition, the weight of evidence indicates that poor HRQOL is associated with poor metabolic outcomes. Intensive diabetes therapies do not appear to reduce HRQOL (56,62,63). Therefore, there is some indication that early intensive therapy leading to improved glycemic control may reduce the impact of diabetes on HRQOL (64).

**Psychological outcomes.** Psychological morbidity is increased in children and adolescents with diabetes (19,20,23,26,65–67), as it is in children with other chronic illnesses (68). Initial adjustment to diabetes is characterized by sadness, anxiety, withdrawal, and dependency (23,66,69,70), and ~30% of children develop a clinical adjustment disorder in the 3 months after diagnosis (69). Such difficulties often resolve within the first year, but poor adaptation in this initial phase places children at risk for later psychological difficulties (19,23,66,71,72). In longitudinal studies using semistructured interviews and standardized diagnostic criteria, 10-year point prevalence and lifetime prevalence rates of psychiatric disorder in diabetic youth were found to be 47% (19) and 37% (23), respectively. These disorder rates are two to three times higher than those found in the general community (73,74).

Mood disorders such as major depressive disorder and dysthymia are the most frequently reported diagnoses in youth with type 1 diabetes, with a cumulative probability of 27.5% by the 10th year of type 1 diabetes duration (20). In cross-sectional studies, depression was observed in 10–26% of study samples using both self- (20,23,75,76) and/or parent-report (25,75,76). Hood et al. (76) noted that parent and youth reports of depression were more highly correlated than in community samples, suggesting that parents of type 1 diabetic youth may be more aware of emotional difficulties in their children because of the high level of involvement required to manage the illness. Kovacs et al. (20) examined recovery and recurrence rates of major depressive disorder in type 1 diabetic youth compared with psychiatric control subjects and found that episodes were

more protracted and recurrence rates were higher in female, but not male, subjects with type 1 diabetes. Maternal psychopathology was identified as a significant risk factor for a diagnosis of depression in the child (19). It is important to note that depression may be underdiagnosed in children with diabetes because of the overlap of symptoms such as fatigue, weight loss, and impaired memory, which are common in both mood disorder and poor metabolic control (77). In addition, fluctuations in blood glucose levels such as hypoglycemic episodes and chronic hyperglycemia may directly contribute to alterations in behavior and mood (78,79), which, while transient, may be distressing for both child and family.

High rates of anxiety (9–19%) and disruptive behavior disorders (12–20%) have also been reported in type 1 diabetic samples (19,20,23,72,75,80,81). Comorbidity is common, with up to 60% of those with a psychiatric diagnosis in some samples meeting criteria for more than one disorder (23,75). Diabetic youth, particularly female patients, also appear to be at increased risk of eating disorders with up to 10% in cross-sectional analyses having full-blown disorders (mainly bulimia nervosa and eating disorder not otherwise specified) and 14% with subthreshold, but clinically relevant, eating disorders (21,82). Of note, there is a continuum of impact of severity of eating disorders on both metabolic control and earlier-than-expected onset of diabetes-related complications, particularly retinopathy (21). These data underline the effects of subthreshold disorders on diabetes-related outcomes, thereby highlighting use of the term subthreshold rather than subclinical in these circumstances. In more than 90% of cases in one study (83), the eating disorder developed after diabetes onset, suggesting that the focus on food and issues around control and autonomy inherent in the diabetes regimen may be contributing factors.

In contrast to the findings reported above, some studies have found prevalence of psychiatric morbidity in young adults with diabetes to be similar to those of control subjects or the general population (46,84). The low rates of psychiatric problems detected by these researchers contrast with the inflated disorder rates generally reported in adults with type 1 diabetes (85) and may be reflective of methodological differences including sampling bias and the use of insufficiently

sensitive assessment instruments. For example, Bryden et al. (46) revealed that they were unable to interview several patients whose medical records were indicative of poor psychosocial outcomes, while Jacobson et al. (84) utilized measures that did not yield diagnoses based on DSM criteria and may not have been sensitive enough to detect psychiatric morbidity. These limitations may have led to an underestimation of the true rate of psychological dysfunction in the respective samples. Canning et al. (86) compared the sensitivity and specificity of behavioral/emotional questionnaires versus DSM-referenced semistructured interviews to detect psychiatric morbidity and found that the former are more useful as screening measures. It is of interest that two studies reporting high levels of morbidity in type 1 diabetic youth (19,23) utilized structured psychiatric interviews to assess symptoms in their samples. In addition, the Joslin sample (84) was predominantly of middle to upper socioeconomic status—a known protective factor in the face of illness-related stress (80). This may limit the generalizability of their findings to more representative samples.

**Psychological adjustment and metabolic control.** Psychological maladjustment in young people with diabetes is particularly concerning because it has been associated with poor metabolic control (23,29–32,80), which in turn increases the risk of diabetes-related complications (1). Causal associations between psychological difficulties and metabolic control are difficult to disentangle (65). In some individuals, neurohormonal changes related to stress and mental illness may directly influence metabolic control through endocrine pathways (87–89). There is a temporal association of insulin resistance at puberty, as well as increased insulin dose, increased appetite, increased weight, disturbance in body image, and adolescent nonadherence, suggesting a link between physiology and psychological health (90). More commonly, it is assumed that psychiatric symptoms adversely affect metabolic control indirectly by preventing or disrupting the behaviors necessary for optimal self-care. For example, 56% of children with psychiatric disorders in the sample studied by Kovacs et al. (91) failed to comply with their medical regimen compared with 17% of those without a diagnosis, while Goldston et al. (75) found that the presence of a psychiatric disorder and family breakdown were

both associated with noncompliance. In a cohort of diabetic youth aged 8–17 years, Hassan et al. (61) noted that those with poor metabolic control were three times more likely to be depressed than those with good control and that for each 1% rise in A1C, there was a 27% increased probability of depression. Maronian et al. (81) also found depression to be associated with poorer control but anxiety was not. Leonard et al. (80) observed that youth exhibiting higher levels of aggression, delinquent behaviors, and attention problems were more than twice as likely to have glycosylated hemoglobin levels >9%, while disengagement and aggressive coping were associated with poorer control in another report (42). Furthermore, depression and behavior problems have been associated with increased risk of multiple diabetes-related hospitalizations (92–94), while adolescents with eating disorders have been found to omit or reduce their insulin dose to produce glycosuria as a method of weight control (95,96). In contrast, some studies do not report positive associations between mood disorders or behavior problems and metabolic control (26,30,97). Multicollinearity between variables and the role of mediating factors such as coping style, locus of control, social supports, and parental psychopathology may explain discrepant findings.

Relationships between metabolic control and psychological well-being in the child are further complicated by evidence that efforts to achieve tight metabolic control may also be associated with psychological symptoms in the child. For example, associations between high anxiety levels and better treatment adherence (72) and between internalizing problems and better glycemic control (33,66,71) have been reported, raising the possibility that neurotic symptoms may either contribute to or result from obsessive preoccupation with the demands of the diabetes treatment regimen. These findings raise the possibility that optimal disease management may have a psychological cost for some children.

**Family dynamics.** The mental health of children and adolescents with diabetes is to some extent dependent on the attitudes and mental health of their parents or caregivers, as well as family functioning (27,31,76,98,99). Diabetes-specific family conflict has been recognized for some time as a critical determinant of metabolic outcome in children and adolescents with type 1 diabetes (100–103). The overall

burden that type 1 diabetes places on families is significant. The areas most impacted appear to be family cohesion, parent/child communication, and family activities (40,41). Among caregivers, it is the mothers of diabetic children who appear to be most at risk of psychological maladjustment after their child is diagnosed. In a large representative European cohort, 20.4% of mothers and 8.3% of fathers exhibited persistent signs and symptoms of posttraumatic stress disorder 1 year after diagnosis of their child (104). Other family members such as nondiabetic siblings do not appear to be at increased risk of poor mental health outcomes (105), at least under contemporary management regimens. In one report, father involvement in diabetes management was associated with a lower number of maternal psychiatric symptoms and with less perceived impact of the disease on family functioning, highlighting the importance of a “team” approach to home management of type 1 diabetes (106).

Communication patterns and relationships within the family may be important influences on metabolic control through impact on treatment adherence in the affected child. Greater parent-child disagreement or lower parental involvement in diabetes care has been shown to predict poorer metabolic control (107). Studies have consistently found that high family conflict is related to poorer diabetes self-care behaviors and poorer metabolic control, while positive family attributes such as support, warmth, and cohesion are associated with better diabetes self-care behaviors and metabolic control (31,33,108–110). Data from several studies indicate that parental (predominantly maternal) psychological well-being correlates positively with all diabetes metabolic outcomes in their children (i.e., happier mother and better outcomes) (111,112). This finding is similar to a study of patient-perceived family stress in adults by Parkerson et al. (113) but is at odds with a more recent study of diabetes-related stress by Stallwood (114). In Stallwood's cross-sectional analysis of caregiver stress using a cohort of 73 caregivers of children aged <9 years, higher levels of both measured and perceived diabetes-related stress by predominantly maternal caregivers were associated with lower A1C levels in diabetic children (114). These interstudy differences may reflect differences in the respondent (caregiver or child), the age of



the child, and the content of the questionnaire. Alternatively, discrepancies may reflect the fact that a certain amount of stress is required to motivate caregivers to adopt some aspects of diabetes care and optimize control, whereas too much stress can lead to a lack of motivation and a sense of helplessness. This is exemplified as parents struggle to find a middle ground between “uninformed carelessness and frantic over-solicitude” (115). The mediating variable between caregiver stress and diabetes outcomes may be the circumstances around blood glucose monitoring (BGM). Disagreement about responsibility of BGM and the level of affect surrounding BGM have both been found to be associated with metabolic outcome (112).

Overall, there is compelling empirical evidence that supports the hypothesis that psychological disorders in the child, as well as family dysfunction, are associated with the neglect or rejection of diabetes treatment requirements and, over time, leads to chronic poor control. This has important implications for clinical management, highlighting the fact that gold-standard medical management must be combined with sensitive attention to psychological well-being in the child as well as adaptive functioning within the family. In addition, good metabolic control may not be synonymous with optimal psychological adjustment, and clinicians should also be alert to symptoms of lowered mood, anxiety, and obsessive tendencies in their young patients with well-controlled diabetes.

#### **Do the tests used by the screening program have sufficient specificity and sensitivity to allow appropriated detection of true positive cases?**

Clinical mental health services cannot be provided for all young people, nor is it necessary; nonetheless, timely and effective intervention with at-risk children and families is essential if they are to avoid the “double jeopardy” of combined adverse physical and mental health outcomes. Subgroups of children at particular risk for adverse outcomes are beginning to emerge from the research to date. Adjustment problems at diagnosis have been found to predict later psychological difficulties (19,23,93,116). Specifically, children already exhibiting externalizing behavior problems at the time of diagnosis were at increased risk of psychiatric diagnoses 10 years later, as well as having

a history of poorer metabolic control (23). This finding is consistent with the developmental psychopathology literature (117–119) that suggests that untreated early-onset behavior problems tend to persist and generalize to broader and more serious forms of psychopathology. However, such problems are easily identifiable and effective; evidence-based treatments are available, particularly if instituted early (120–122) and targeted to the specific characteristics of the individual child and family (123). Sequential use of validated functional health and behavioral questionnaires can be used in a stepwise fashion to screen for children and families that are exhibiting latent or overt behavioral difficulties (48). The CHQ (39) is a simple-to-use questionnaire that has a sensitivity of 73% and specificity of 82% to detect behavioral problems in children with diabetes (48). Although this means that a proportion of children at borderline risk will not be identified, these children return to clinics regularly, which provides regular opportunities for ongoing monitoring. Patients positively identified by the CHQ or other tools with good reliability could then be further and more definitively investigated by discussion with the child and parents, as well as administration of a formal mental health instrument such as the Behavior Assessment System for Children (124). This instrument generates subscale scores (e.g., depression, anxiety, conduct problems) and global scores that would help identify the specific nature of the mental health problem to be addressed.

It is neither feasible for most diabetes clinics to offer routine mental health screening for all parents, nor is it acceptable to all parents. However, given the associations between psychological well-being in diabetic youth and the mental health of their parents (27,76,87,111,112), as well as the associations between family conflict and metabolic control (100–103), it would also be important to address parental psychopathology and family functioning in at-risk children. Optimal clinical care should incorporate routine mental health screening of all children soon after diagnosis and thereafter, with further parent/family assessment and active evidence-based interventions addressing both psychological well-being and adherence issues offered to at-risk children and families.

#### **Is there an adequate intervention strategy for those patients detected by the screening process?**

Recent reviews of the efficacy of behavioral and psychological interventions to improve outcomes in type 1 diabetes have noted the inconsistent findings in this area (125–127). Much of the confusion derives from methodological deficiencies such as small unrepresentative samples and nonstandardized measures of poorly defined constructs (128–132). Selection bias has also been an issue. Methods and instruments used have varied widely, making it difficult to compare findings across studies. Some interventions have not used comparison groups (131,132), or if used, experimental and comparison groups have been unequal in terms of pre-intervention characteristics (122,123). Most studies have used unstandardized interventions involving increased contact and support, psychoeducation, and/or cognitive behavior techniques to elicit behavior change around diabetes management rather than targeting underlying feelings of anger or dysphoria. Psychological distress unrelated to noncompliance has largely been ignored, and it is notable that no intervention to date has targeted a specific psychological disorder such as depression or behavior problems. It is possible that an intervention specifically addressing underlying dysphoria may be more effective than one targeting the secondary manifestation of the primary symptom, i.e., reduced treatment adherence. Empirical support for this view is currently lacking, but the limited evidence for the efficacy of interventions focused on diabetes management alone suggests that such an approach is worthy of consideration. Finally, most interventions to date have been implemented with adolescent cohorts, and little attention has been paid to younger children, in whom preventive interventions may have their greatest benefit. As noted above, behavior problems in young children are easily identifiable and tend to persist if untreated (117–119), but they respond positively to intervention if treatment is implemented early (120).

Currently, there is no universally recommended intervention strategy for behavioral or psychological distress in children with diabetes (126). In the U.K., the Development and Evaluation of a Psychosocial Intervention for Children and Teenagers Experiencing Diabetes (133) Study is currently attempting to construct such a psychosocial intervention. Psycho-

social interventions however may not need to be diabetes specific. There is empirical evidence that standardized non-diabetes-specific tools (such as the "Triple P-Positive Parenting Program" [134]) used in at-risk children from the time of diagnosis may be of benefit. Parental psychopathology and family conflict may be best addressed using standard therapeutic approaches, such as individual and family therapy, as an adjunct to specific interventions for the child with type 1 diabetes. The next challenge is to test the efficacy of these interventions in well-constructed and adequately powered randomized control trials.

### Is the screening process cost-effective?

Given that routine mental health screening and intervention therapies are yet to be undertaken in diabetes clinics, this question cannot be fully answered. Two salient points should be noted, however. First, self-administered questionnaire tools are relatively inexpensive, and second, they can and, we argue, should be used sequentially with other clinical tools/interviews. Thus, a step-wise screening process that does not require every patient to be seen by a mental health professional should not be unwieldy or expensive. In addition, if one accepts the premise that all patients with overt or latent mental health difficulties will need to be seen by a mental health professional at some stage, then formal health care professional involvement should be cost neutral compared with current models of care. On the other hand, benefits of improved mental health, improved treatment adherence, and subsequent improved diabetes outcomes have the potential to greatly reduce overall diabetes-related health expenditure. What is clear from vast clinical experience is that failure to recognize psychosocial/psychological distress inevitably leads to ineffective and often inappropriate efforts to intensify therapy, which may compound the distress and in fact worsen diabetes outcomes.

### Conclusions

A key element in the proactive approach to diabetes management is complications screening. Consensus guidelines have largely focused on detecting early microvascular pathology (3–7). Current therapeutic approaches in youth with type 1 diabetes have led to low ascertainment rates of microvascular pathology (15–18).

Current rates of psychological ill health in diabetic youth on the other hand appear to be disturbingly high (19,20,23,26). The combined longitudinal data published by Kovacs et al. (30), Northam et al. (23), and Bryden et al. (22,46,135) indicate that mental health issues in childhood are likely to persist into early adulthood and possibly beyond. Importantly, such mental health issues appear to be prognostic of maladaptive lifestyle practices, long-term problems with diabetes control, and earlier-than-expected onset of complications.

We argue therefore that mental health should be given equivalence to, and perhaps precedence over, other complication screenings used in diabetes clinics. Routine screening for behavioral disturbance should begin in children at the time of diabetes diagnosis, with further assessment of parental mental health and family functioning for at-risk children. Interventions can then be targeted based on the specific needs of individual children and families. In addition, physicians should be alert to the possibility of cognitive changes and learning difficulties in children with diabetes and request assessment early to minimize any negative effects on academic progress.

The desired outcomes of optimal physiological, cognitive, and emotional development are interrelated and should not be seen as independent of one another. The term diabetes complications should encompass not only microvascular and autoimmune pathologies but also the more common psychological ill health seen in the young. Thus, complication screening programs should include a mental health component, potentially with screening from the point of diabetes diagnosis. Given the universal experience of diminishing or static health resources per patient, this means a realignment of priorities within the overall screening process. Consideration should be given to simplifying screening for the relatively rare microvascular and autoimmune disorders in order to release resources for screening for the relatively common psychological disorders. Ultimately, improvements in psychological outcomes are desirable both in their own right and because of the potential benefits in the adoption of adaptive lifestyle choices and improvement of disease control.

### References

1. Diabetes Control and Complications Trial Research Group: The effect of intensive diabetes treatment of diabetes on the development and progression of long-term complications in insulin-dependent diabetes mellitus. *N Engl J Med* 329:977–986, 1993
2. Writing Team for the Diabetes Control and Complications Trial/Epidemiology of Diabetes Interventions and Complications Research Group: Sustained effect of intensive treatment of type 1 diabetes mellitus on development and progression of diabetic nephropathy: the Epidemiology of Diabetes Interventions and Complications (EDIC) study. *JAMA* 290: 2159–2167, 2003
3. ISPAD Guidelines: *Consensus Guidelines for the Management of Type-1 Diabetes Mellitus in Children and Adolescents*. Swift PGF, Ed. Zeist, the Netherlands, Medforum, 2000
4. American Diabetes Association: Standards of medical care in diabetes (Position Statement). *Diabetes Care* 28 (Suppl. 1):S4–S36, 2005
5. Australasian Paediatric Endocrine Group: Clinical practice guidelines: type 1 diabetes in children and adolescents [available online], 2005. Available from [http://www.chw.edu.au/prof/services/endocrinology/apeg/apeg\\_handbook\\_final.pdf](http://www.chw.edu.au/prof/services/endocrinology/apeg/apeg_handbook_final.pdf). Accessed 26 February 2006
6. National Institute for Health and Clinical Excellence: Type 1 diabetes: diagnosis and management of type 1 diabetes in children and young people [available online], 2004. Available from <http://www.nice.org.uk/pdf/CG015childrenfullguideline.pdf>. Accessed 26 February 2006
7. Canadian Diabetes Association Clinical Practice Guidelines Expert Committee: Canadian Diabetes Association 2003 clinical practice guidelines for the prevention and management of diabetes in Canada. *Can J Diabetes* 27 (Suppl. 2): S84–S90, 2003
8. Morrison A: Screening. In *Modern Epidemiology*, 2nd ed. Rothman K, Greenland S, Eds. Philadelphia, Lippincott-Raven, 1998, p. 499–518
9. Schultz CJ, Neil HA, Dalton RN, Dunger DB; Oxford Regional Prospective Study Group: Risk of nephropathy can be detected before the onset of microalbuminuria during the early years after diagnosis of type 1 diabetes. *Diabetes Care* 23:1811–1815, 2000
10. Davis EA, Keating B, Byrne GC, Russell M, Jones TW: Impact of improved glycaemic control on rates of hypoglycaemia in insulin dependent diabetes mellitus. *Arch Dis Child* 78:111–115, 1998
11. Tamborlane WV, Bonfig W, Boland E:

- Recent advances in treatment of youth with type 1 diabetes: better care through technology. *Diabet Med* 18:864–870, 2001
12. Bulsara MK, Holman CD, Davis EA, Jones TW: The impact of a decade of changing treatment on rates of severe hypoglycemia in a population-based cohort of children with type 1 diabetes. *Diabetes Care* 27:2293–2298, 2004
  13. Gale EAM: Type 1 diabetes in the young: the harvest of sorrow goes on. *Diabetologia* 48:1435–1438, 2005
  14. Scottish Study Group for the Care of the Young with Diabetes: A longitudinal observational study of insulin therapy and glycaemic control in Scottish children with type 1 diabetes: DIABAUD 3. *Diabet Med* 23:1216–1221, 2006
  15. Mohsin F, Craig ME, Cusumano J, Chan AK, Hing S, Lee JW, Silink M, Howard NJ, Donaghue KC: Discordant trends in microvascular complications in adolescents with type 1 diabetes from 1990 to 2002. *Diabetes Care* 28:1974–1980, 2005
  16. Kong A, Donath S, Harper CA, Werther GA, Cameron FJ: Rates of diabetes-related complications in a contemporary adolescent cohort. *J Pediatr Endocrinol Metab* 18:247–256, 2005
  17. Skrivarhaug T, Bangstad HJ, Stene LC, Sandvik L, Hanssen KF, Joner G: Low risk of overt nephropathy after 24 yr of childhood-onset type 1 diabetes mellitus (T1DM) in Norway. *Pediatr Diabetes* 7:239–246, 2006
  18. Huo B, Steffen AT, Swan K, Sikes K, Weinzimer SA, Tamborlane WV: Clinical outcomes and cost-effectiveness of retinopathy screening in youth with type 1 diabetes. *Diabetes Care* 30:362–363, 2007
  19. Kovacs M, Goldston D, Obrosky DS, Bonnar LK: Psychiatric disorders in youths with IDDM: rates and risk factors. *Diabetes Care* 20:36–44, 1997
  20. Kovacs M, Obrosky DS, Goldston D, Drash A: Major depressive disorder in youths with IDDM: a controlled prospective study of course and outcome. *Diabetes Care* 20:45–51, 1997
  21. Jones JM, Lawson ML, Daneman D, Olmsted MP, Rodin G: Eating disorders in adolescent females with and without type 1 diabetes: cross-sectional study. *BMJ* 320:1563–1566, 2000
  22. Bryden KS, Dunger DB, Mayou RA, Peveler RC, Neil HA: Poor prognosis of young adults with type 1 diabetes: a longitudinal study. *Diabetes Care* 26:1052–1057, 2003
  23. Northam EA, Matthews LK, Anderson PJ, Cameron FJ, Werther GA: Psychiatric morbidity and health outcome in type 1 diabetes: perspectives from a prospective longitudinal study. *Diabet Med* 22:152–157, 2005
  24. Goldney RD, Phillips PJ, Fisher LJ, Wilson DH: Diabetes, depression, and quality of life. *Diabetes Care* 27:1066–1070, 2004
  25. Close H, Davies AG, Price DA, Goodyer IM: Emotional difficulties in diabetes mellitus. *Arch Dis Child* 61:337–340, 1986
  26. Blanz B, Rensch-Riemann B, Frotz-Sigmund D, Schmidt M: IDDM is a risk factor for adolescent psychiatric disorders. *Diabetes Care* 16:1579–1587, 1993
  27. Grey M, Boland EA, Yu C, Sullivan-Bolyai S, Tamborlane WV: Personal and family factors associated with quality of life in adolescents with diabetes. *Diabetes Care* 21:909–914, 1998
  28. Jacobson AM, Hauser ST, Lavori P, Willett JB, Cole CF, Wolfsdorf JI, Dumont RH, Wertlieb D: Family environment and glycaemic control: a four-year prospective study of children and adolescents with insulin-dependent diabetes mellitus. *Psychosom Med* 56:401–409, 1994
  29. Dumont RH, Jacobson AM, Cole C, Hauser ST, Wolfsdorf JI, Willett JB, Milley JE, Wertlieb D: Psychosocial predictors of acute complications of diabetes in youth. *Diabet Med* 12:612–618, 1995
  30. Kovacs M, Mukerji P, Iyengar S, Drash A: Psychiatric disorder and metabolic control among youths with IDDM: a longitudinal study. *Diabetes Care* 19:318–323, 1996
  31. Liss DS, Waller DA, Kenard BD, McIntire D, Capra P, Stepherns J: Psychiatric illness and family support in children and adolescents with diabetic ketoacidosis: a controlled study. *J Am Acad Child Adolesc Psychiatry* 37:536–544, 1998
  32. Rewers A, Chase HP, Mackenzie T, Walvarens P, Roback M, Rewers M, Hamman RF, Klingensmith G: Predictors of acute complications in children with type 1 diabetes. *JAMA* 287:2511–2518, 2002
  33. Cohen DM, Lumley MA, Naar-King S, Partridge T, Cakan N: Child behavior problems and family functioning as predictors of adherence and glycemic control in economically disadvantaged children with type 1 diabetes: a prospective study. *J Pediatr Psychol* 29:171–184, 2004
  34. Mortensen HB; on behalf of the Hvidore Study Group on Childhood Diabetes: Findings from the Hvidore Study Group on Childhood Diabetes: metabolic control and quality of life. *Horm Res* 57 (Suppl. 1):117–120, 2002
  35. Watkins K, Connell CM: Measurement of health-related QOL in diabetes mellitus. *Pharmacoeconomics* 22:1109–1126, 2004
  36. Parkerson GR Jr, Connis RT, Broadhead WE, Patrick DL, Taylor TR, Tse CK: Disease-specific versus generic measurement of health-related quality of life in insulin-dependent diabetic patients. *Med Care* 31:629–639, 1993
  37. Varni JW, Burwinkle TM, Jacobs JR, Gottschalk M, Kaufman F, Jones KL: The PedsQL in type 1 and type 2 diabetes: reliability and validity of the Pediatric Quality of Life Inventory generic core scales and type 1 diabetes module. *Diabetes Care* 26:631–637, 2003
  38. Laffel LM, Connell A, Vangsness L, Goebel-Fabbri A, Mansfield A, Anderson BJ: General quality of life in youth with type 1 diabetes: relationship to patient management and diabetes-specific family conflict. *Diabetes Care* 26:3067–3073, 2003
  39. Landgraf JM, Abetz L, Ware JE: *Child Health Questionnaire (CHQ): A User's Manual*. Boston, MA, The Health Institute, New England Medical Center, 1996
  40. Wake M, Hesketh K, Cameron FJ: The functional health status of children with diabetes. *Diabet Med* 17:700–707, 2000
  41. Hesketh KD, Wake MA, Cameron FJ: Health-related quality of life and metabolic control in children with type 1 diabetes: a prospective cohort study. *Diabetes Care* 27:415–420, 2004
  42. Graue M, Wentzel-Larsen T, Hanestad B, Batsvik B, Sovik O: Measuring self-reported, health-related, quality of life in adolescents with type 1 diabetes using both generic and disease-specific instruments. *Acta Paediatrica* 92:1190–1196, 2003
  43. Sawyer MG, Reynolds KE, Couper JJ, French DJ, Kennedy D, Martin J, Staugas R, Ziaian T, Baghurst PA: Health-related quality of life of children and adolescents with chronic illness—a two year prospective study. *Qual Life Res* 13:1309–1319, 2004
  44. Norrby U, Nordholm L, Andersson-Gare B, Fasth A: Health-related quality of life in children diagnosed with asthma, diabetes, juvenile chronic arthritis or short stature. *Acta Paediatr* 95:450–456, 2006
  45. Ziaian T, Sawyer MG, Reynolds KE, Carbone JA, Clark JJ, Baghurst PA, Couper JJ, Kennedy D, Martin AJ, Staugas RE, French DJ: Treatment burden and health-related quality of life of children with diabetes, cystic fibrosis and asthma. *J Paediatr Child Health* 42:596–600, 2006
  46. Bryden KS, Peveler RC, Stein A, Neil A, Mayou RA, Dunger DB: Clinical and psychological course of diabetes from adolescence to young adulthood: a longitudinal cohort study. *Diabetes Care* 24:1536–1540, 2001
  47. Dabaghdao P, Vidmar S, Cameron FJ: Deteriorating diabetic control through adolescence: do the origins lie in childhood? *Diabet Med* 18:889–894, 2001



48. Cameron FJ, Smidts D, Hesketh K, Wake M, Northam EA: Early detection of emotional and behavioural problems in children with diabetes: the validity of the CHQ as a screening instrument. *Diabet Med* 20:646–650, 2003
49. Wake M, Hesketh K, Waters E, Wright M: Functional health status in six paediatric clinical populations: extending the use of the Child Health Questionnaire for Australian Children. Australian Institute of Health and Welfare, 1999 (Catalogue no. HOC 3 1999)
50. Boman KK, Viksten J, Kogner P, Samuelsson U: Serious illness in childhood: the different threats of cancer and diabetes from a parent perspective. *J Pediatr* 145:373–379, 2004
51. Sprangers MAG, Schwartz CE: Integrating response shift into health-related quality of life research: a theoretical model. In *Adaptation to Changing Health: Response Shift in Quality of Life Research*. Schwartz CE, Sprangers MAG, Eds. Washington, DC, American Psychological Association, 2000, p. 11–23
52. Eiser C, Berrenberg JL: Assessing the impact of chronic disease on the relationship between parents and their adolescents. *J Psychosom Res* 2:109–114, 1995
53. Trief PM, Wade MJ, Pine D, Weinstock RS: A comparison of health-related quality of life of elderly and younger insulin-treated adults with diabetes. *Age Ageing* 32:613–618, 2003
54. Ingersoll GM, Marrero DG: A modified quality-of-life measure for youths: psychometric properties. *Diabetes Educ* 17:114–118, 1991
55. Influence of intensive diabetes treatment on quality-of-life outcomes in the Diabetes Control and Complications Trial. *Diabetes Care* 19:195–203, 1996
56. Hoey H, Aanstoot HJ, Chiarelli F, Daneman D, Danne T, Dorchy H, Fitzgerald M, Garandeau P, Greene S, Holl R, Hougaard P, Kaprio E, Kocova M, Lynggaard H, Martul P, Matsuura N, McGee HM, Mortensen HB, Robertson K, Schoenle E, Sovik O, Swift P, Tsou RM, Vanelli M, Aman J: Good metabolic control is associated with better quality of life in 2,101 adolescents with type 1 diabetes. *Diabetes Care* 24:1923–1928, 2001
57. Hoey H, McGee HM, Fitzgerald M, Mortensen HB, Hougaard P, Lynggaard H, Skovlund SE, Aanstoot HJ, Chiarelli F, Daneman D, Danne T, Dorchy H, Garandeau P, Greene S, Holl R, Kaprio E, Kocova M, Martul P, Matsuura N, Robertson K, Schoenle E, Sovik O, Swift P, Tsou RM, Vanelli M, Aman J; for the Hvidovre Study Group on Childhood Diabetes: Parent and health professional perspectives in the management of adolescents with diabetes: development of assessment instruments for international studies. *Qual Life Res* 15:1033–1042, 2006
58. Shehadeh N, Battelino T, Galatzer A, Naveh T, Hadash A, de Vries L, Phillip M: Insulin pump therapy for 1–6 year old children with type 1 diabetes. *Isr Med Assoc J* 6:284–286, 2004
59. McMahon SK, Airey FL, Marangou DA, McElwee KJ, Carne CL, Clarey AJ, Davis EA, Jones TW: Insulin pump therapy in children and adolescents: improvements in key parameters of diabetes management including quality of life. *Diabet Med* 22:92–96, 2005
60. Guttmann-Bauman I, Flaherty BP, Strugger M, McEvoy RC: Metabolic control and quality-of-life self-assessment in adolescents with IDDM. *Diabetes Care* 21:915–918, 1998
61. Hassan K, Loar R, Anderson BJ, Heptulla RA: The role of socioeconomic status, depression, quality of life, and glycemic control in type 1 diabetes mellitus. *J Pediatr* 149:526–531, 2006
62. Valenzuela JM, Patino AM, McCullough J, Ring C, Sanchez J, Eidson M, Nemery R, Delamater AM: Insulin pump therapy and health-related quality of life in children and adolescents with type 1 diabetes. *J Pediatr Psychol* 31:650–660, 2006
63. Juliusson PB, Graue M, Wentzel-Larsen T, Sovik O: The impact of continuous subcutaneous insulin infusion on health-related quality of life in children and adolescents with type 1 diabetes. *Acta Paediatr* 95:1481–1487, 2006
64. Jacobson AM: Impact of improved glycemic control on quality of life in patients with diabetes. *Endocr Pract* 10:502–508, 2004
65. Dantzer C, Swendsen J, Maurice-Tison S, Salamon R: Anxiety and depression in juvenile diabetes: a critical review. *Clin Psychol Rev* 23:787–800, 2003
66. Grey M, Cameron M, Lipman TH, Thurber FW: Psychosocial status of children with diabetes in the first 2 years after diagnosis. *Diabetes Care* 18:1330–1336, 1995
67. Holmes CS, Respass D, Greer T, Frenz J: Behavior problems in children with diabetes: disentangling possible scoring confounds on the Child Behavior Checklist. *J Pediatr Psychol* 23:179–185, 1998
68. Lavigne JV, Faier-Routman J: Psychological adjustment to pediatric physical disorders: a meta-analytic review. *J Pediatr Psychol* 17:133–157, 1992
69. Kovacs M, Feinberg TL, Paulauskas S, Finkelstein R, Pollock M, Crouse-Novak M: Initial coping responses and psychosocial characteristics of children with insulin-dependent diabetes mellitus. *J Pediatr* 106:827–834, 1985
70. Northam E, Anderson P, Adler R, Werther G, Warne G: Psychosocial and family functioning in children with insulin-dependent diabetes at diagnosis and one year later. *J Paediatr Psychol* 21:699–717, 1996
71. Kovacs M, Ho V, Pollock MH: Criterion and predictive validity of the diagnosis of adjustment disorder: a prospective study of youths with new-onset insulin-dependent diabetes mellitus. *Am J Psychiatry* 152:523–528, 1995
72. Daviss WB, Coon H, Whitehead P, Ryan K, McMahon W: Predicting diabetic control from competence, adherence, adjustment, and psychopathology. *J Am Acad Child Adolesc Psychiatry* 34:1629–1636, 1995
73. Bird HR: Epidemiology of childhood disorders in a cross-cultural context. *J Child Psychol Psychiatry* 37:35–49, 1996
74. Sawyer MG, Arney FM, Baghurst PA, Clark JJ, Graetz BW, Kosky RJ, Nurcombe B, Patton GC, Prior MR, Raphael B, Rey JM, Whaites LC, Zubrick SR: The mental health of young people in Australia: key findings from the Child and Adolescent Component of the National Survey of Mental Health and Well-Being. *Aust N Z J Psychiatry* 35:806–814, 2001
75. Goldston DB, Kelley AE, Reboussin DM, Daniel SS, Smith JA, Schwartz RP, Lorentz W, Hill C: Suicidal ideation and behaviour and noncompliance with the medical regimen among diabetic adolescents. *J Am Acad Child Adolesc Psychiatry* 36:1528–1536, 1997
76. Hood KK, Huestis S, Maher A, Butler D, Volkening L, Laffel LM: Depressive symptoms in children and adolescents with type 1 diabetes: association with diabetes-specific characteristics. *Diabetes Care* 29:1389–1391, 2006
77. Jacobson AM: Current concepts: the psychological care of patients with insulin-dependent diabetes mellitus. *N Engl J Med* 334:1249–1253, 1996
78. Matyka KA, Wigg L, Pramming S, Stores G, Dungar DB: Cognitive function and mood after profound nocturnal hypoglycaemia in prepubertal children with conventional insulin treatment for diabetes. *Arch Dis Child* 81:138–142, 1999
79. McDonnell CM, Northam EA, Donath SM, Werther GA, Cameron FJ: Hyperglycemia and externalizing behavior in children with type 1 diabetes. *Diabetes Care* 30:2211–2215, 2007
80. Leonard BJ, Jang YP, Savik K, Plumbo PM, Christenson R: Psychosocial factors associated with levels of metabolic control in youth with type 1 diabetes. *Pediatr Nursing* 7:28–37, 2002
81. Maronian S, Vila G, Robert J, Mouren-Simeoni M: Troubles DSM-IV, equilibre metabolique et complications somatiques dans le diabete insulino-dependant de l'enfant et de l' adolescent.

- Annales Medico Psychologiques* 157:320–331, 1999
82. Steel JM, Young RJ, Lloyd GC, MacIntyre CC: Abnormal eating attitudes in young insulin-dependent diabetics. *Br J Psychiatry* 155:515–521, 1989
  83. Marcus MD, Wing RR: Eating disorders and diabetes. In *Neuropsychological and Behavioral Aspects of Diabetes*. Holmes CS, Ed. New York, Springer-Verlag, 1990, p. 102–121
  84. Jacobson AM, Hauser ST, Willett JB, Wolfsdorf JI, Dvorak R, Herman L, de Groot M: Psychological adjustment to IDDM: 10-year follow-up of an onset cohort of child and adolescent patients. *Diabetes Care* 20:811–818, 1997
  85. Gavard JA, Lustman PJ, Clouse RE: Prevalence of depression in adults with diabetes: an epidemiological evaluation. *Diabetes Care* 6:1167–1178, 1993
  86. Canning EH, Kelleher K: Performance of screening tools for mental health problems in chronically ill children. *Arch Pediatr Adolesc Med* 148:272–278, 1994
  87. Chase HP, Jackson GG: Stress and sugar control in children with insulin-dependent diabetes mellitus. *J Pediatr* 98:1011–1013, 1981
  88. Schade DS, Eaton RP: The temporal relationship between endogenously secreted stress hormones and metabolic decompensation in diabetic man. *J Clin Endocrinol Metab* 50:131–136, 1980
  89. Shamoon H, Hendlar R, Sherwin RS: Altered responsiveness to cortisol, epinephrine, and glucagon in insulin-infused juvenile-onset diabetes. *Diabetes* 29:284–291, 1980
  90. Hamilton J, Daneman D: Deteriorating diabetes control during adolescence: physiological or psychosocial? *J Pediatr Endocrinol Metab* 15:115–126, 2002
  91. Kovacs M, Goldston D, Obrosky S, Iyengar S: Prevalence and predictors of pervasive non-compliance with medical treatment among youths with insulin-dependent diabetes mellitus. *J Am Acad Child Adol Psychiatry* 31:1112–1119, 1992
  92. Seiffge-Krenke I, Stemmler M: Coping with everyday stress and links to medical and psychosocial adaptation in diabetic adolescents. *J Adolesc Health* 33:180–188, 2003
  93. Charron-Prochownik D, Kovacs M, Obrosky DS, Stiffler L: Biomedical and psychosocial predictors of early rehospitalisation among children with insulin-dependent diabetes mellitus: a longitudinal study. *Diabet Med* 11:372–377, 1994
  94. Stewart SM, Rao J, Emslie GJ, Klein D, White PC: Depressive symptoms predict hospitalization for adolescents with type 1 diabetes mellitus. *Pediatrics* 115:1315–1319, 2005
  95. Peveler R, Fairburn C, Boller I, Dunger D: Eating disorders in adolescents with IDDM. *Diabetes Care* 15:1356–1360, 1992
  96. Rydall AC, Rodin GM, Olmsted MP, Devenyi RG, Daneman D: Disordered eating behavior and microvascular complications in young women with insulin-dependent diabetes mellitus. *N Engl J Med* 336:1849–1854, 1997
  97. Grey M, Cameron ME, Thurber FW: Coping and adaptation in children with diabetes. *Nursing Research* 40:144–149, 1991
  98. Maharaj SI, Rodin GM, Olmsted MP, Connolly JA, Daneman D: Eating disturbances in girls with diabetes: the contribution of adolescent self-concept, maternal weight and shape concerns and mother-daughter relationships. *Psychol Med* 33:525–539, 2003
  99. Wallander JL, Varni JW: Effects of pediatric chronic physical disorders on child and family adjustment. *J Child Psychol Psychiatry* 39:29–46, 1998
  100. Anderson BJ, Miller JP, Auslander W, Santiago J: Family characteristics of diabetic adolescents: relations to metabolic control. *Diabetes Care* 4:586–594, 1981
  101. Standen PJ, Hinde FR, Lee PJ: Family involvement and metabolic control of childhood diabetes. *Diabet Med* 2:137–140, 1985
  102. Anderson BJ: Children with diabetes mellitus and family functioning: translating research into practice. *J Pediatr Endocrinol Metab* 14 (Suppl. 1):645–652, 2001
  103. Anderson BJ, Vangsness L, Connell A, Butler D, Goebel-Fabbri A, Laffel LMB: Family conflict, adherence, and glycemic control in youth with short duration type 1 diabetes. *Diabet Med* 19:635–642, 2002
  104. Landolt MA, Vollrath M, Laimbacher J, Gnehm HE, Sennhauser FH: Prospective study of posttraumatic stress disorder in parents of children with newly diagnosed type 1 diabetes. *J Am Acad Child Adolesc Psychiatry* 44:682–689, 2005
  105. Sleeman F: *Childhood Diabetes: The Roles of Family Environment, Sibling Relationships and Temperament in the Adjustment of Well Siblings*. PhD thesis. Victoria, Australia, Monash University, 2007
  106. Gavin L, Wysocki T: Associations of paternal involvement on disease management with maternal and family outcomes in families with children with chronic illness. *J Pediatr Psychol* 31:481–489, 2006
  107. Anderson BJ, Brackett J, Ho J, Laffel L: An office-based intervention to maintain parent-adolescent teamwork in diabetes management: impact on parent involvement, family conflict, and subsequent glycemic control. *Diabetes Care* 22:713–721, 1999
  108. Viner R, McGrath M, Trudinger P: Family stress and metabolic control in diabetes. *Arch Dis Child* 74:418–421, 1996
  109. Miller-Johnson S, Emery RE, Marvin RS, Clarke W, Lovinger R, Martin M: Parent-child relationships and the management of insulin-dependent diabetes mellitus. *J Consult Clin Psychol* 62:603–610, 1994
  110. Overstreet S, Goins J, Chen RS, Holmes CS, Greer T, Dunlap WP, Frenz J: Family environment and the interrelation of family structure, child behavior, and metabolic control for children with diabetes. *J Pediatr Psychol* 20:435–447, 1995
  111. Liakopoulou M, Alifiraki T, Katideniou A, Peppas M, Maniati M, Tzikas D, Hibbs ED, Dacou-Voutetakis C: Maternal expressed emotion and metabolic control of children and adolescents with diabetes mellitus. *Psychother Psychosom* 70:78–85, 2001
  112. Hood KK, Butler DA, Volkering LK, Anderson BJ, Laffel LM: The Blood Glucose Monitoring Communication questionnaire: an instrument to measure affect specific to blood glucose monitoring. *Diabetes Care* 27:2610–2615, 2004
  113. Parkerson G, Broadhead W, Tse C: Perceived family stress as a predictor of health-related outcomes. *Arch Fam Med* 4:253–620, 1995
  114. Stallwood L: Influence of caregiver stress and coping on glycemic control of young children with diabetes. *J Pediatr Health Care* 19:293–300, 2005
  115. Kanner L: Do behavioral symptoms always indicate psychopathology? *J Child Psychol Psychiatr* 1:17–25, 1960
  116. Maharaj S, Daneman D, Olmsted M, Rodin G: Metabolic control in adolescent girls: links to relationality and the female sense of self. *Diabetes Care* 27:709–715, 2004
  117. Cicchetti D, Rogosch FA: A developmental psychopathology perspective on adolescence. *J Consult Clin Psychol* 70:6–20, 2002
  118. Hinshaw SP: Process, mechanism and explanation related to externalising behaviour in developmental psychopathology. *J Abn Child Psychol* 30:431–446, 2002
  119. Rutter M, Sroufe LA: Developmental psychopathology: concepts and challenges. *Dev Psychopathol* 12:265–296, 2000
  120. Sanders MR: The Triple P-Positive Parenting Program: towards an empirically validated multi-level parenting and family support strategy for the prevention of behaviour and emotional problems in children. *Clin Child Fam Psychol Rev* 2:71–90, 1999
  121. Wysocki T, Greco P, Harris MA, Bubb J, White NH: Behavior therapy for families of adolescents with diabetes. *Diabetes Care* 24:441–446, 2001
  122. Wysocki T, Harris MA, Buckloh LM,



- Mertlich D, Lochrie AS, Mauras N, While NH: Randomised trial of behavioral family systems therapy for diabetes. *Diabetes Care* 30:555–560, 2007
123. Ellis DA, Yopp J, Templin T, Naar-King S, Frey MA, Cunningham PB, Idalski A, Niec LN: Family mediators and moderators of treatment outcomes among youths with poorly controlled type 1 diabetes. *J Pediatr Psychol* 32:194–205, 2007
124. Reynolds CR, Kamphaus RW: *Behaviour Assessment System for Children Manual*. Circle Pines, MN, American Guidance Services, 1992
125. Northam EA, Todd S, Cameron FJ: Interventions to promote optimal health outcomes in children with type 1 diabetes: are they effective? *Diabet Med* 23:113–121, 2006
126. Murphy HR, Rayman G, Skinner TC: Psycho-educational interventions for children and young people with type 1 diabetes. *Diabet Med* 23:935–943, 2006
127. Winkley K, Ismail K, Landau S, Eisler I: Psychological interventions to improve glycaemic control in patients with type 1 diabetes: systematic review and meta-analysis of randomised controlled trials. *BMJ* 333:65, 2006
128. Satin W, La Greca AM, Zigo S, Skyler JS: Diabetes in adolescence: Effects of multi-family group intervention and parent simulation of diabetes. *J Pediatr Psychol* 14:259–276, 1989
129. Mendez FJ, Belendez M: Effects of a behavioral intervention on treatment adherence and stress management in adolescents with IDDM. *Diabetes Care* 20:1370–1375, 1997
130. Greco P, Pendley JS, McDonell K, Reeves G: A peer group intervention for adolescents with diabetes and their best friends. *J Pediatr Psychol* 26:485–490, 2001
131. Hains AA, Davies WH, Parton E, Silverman AH: Brief report: a cognitive behavioral intervention for distressed adolescents with type 1 diabetes. *J Pediatr Psychol* 26:61–66, 2001
132. Channon S, Smith VJ, Gregory JW: A pilot study of motivational interviewing in adolescents with diabetes. *Arch Dis Child* 88:680–683, 2003
133. The National Coordinating Centre for Health Technology Assessment: The DEPICTED Study, 2005. Available from <http://www.ncchta.org/project.asp?PjtId=1450>. Accessed 28 February 2007
134. Sanders M, Markie-Dadds C, Tully L: The triple P-positive parenting program: a comparison of enhanced, standard and self-directed behavioral family intervention for parents with early onset conduct problems. *J Consult Clin Psychol* 68:624–640, 2000
135. Bryden KS, Neil A, Mayou RA, Peveler RC, Fairburn CG, Dunger DB: Eating habits, body weight, and insulin misuse: a longitudinal study of teenagers and young adults with type 1 diabetes. *Diabetes Care* 22:1956–1960, 1999
